# Supplementary material
Source: publisher figshare collection journal article supplement (https://acs.figshare.com/ndownloader/files/22788230)
Supplement: Supplementary file 1 [file 22788230]

Compound	SMILE	hFPR2 EC50 (nM)	hFPR1 EC50 (nM)
1	O=C(NC1=CC=C(Cl)C=C1)NCCC2=CC=C(OC)C=C2	990
2a	O=C(NC1=CC=C(Cl)C=C1)NC(C)CC2=CC=C(OC)C=C2	23
2b	O=C(NC1=CC=C(Cl)C=C1)NC(CO)CC2=CC=C(OC)C=C2	6.8
2c	O=C(NC1=CC=C(Cl)C=C1)NC(C(O)=O)CC2=CC=C(OC)C=C2	31
2d	O=C(NC1=CC=C(Cl)C=C1)NC(C(N)=O)CC2=CC=C(OC)C=C2	3.6	>10000
3	O=C(NC1=CC=C(Cl)C=C1)N[C@@H](C(N2)=O)[C@@H]2C3=CC=C(OC)C=C3	12	>10000
4	O=C(NC1=CC=C(Cl)C=C1)N[C@H](C(N2)=O)[C@@H]2C3=CC=C(OC)C=C3	>100	>10000
5	O=C(NC1=CC=C(Cl)C=C1)N[C@@H](C(NC2)=O)[C@@H]2C3=CC=C(OC)C=C3	0.91	100
6	O=C(NC1=CC=C(Cl)C=C1)N[C@H](C(NC2)=O)[C@@H]2C3=CC=C(OC)C=C3	0.18	31
7	O=C(NC1=CC=C(Cl)C=C1)N[C@H](C(NCC2)=O)[C@@H]2C3=CC=C(OC)C=C3	0.11	<10
8	ClC(C=C1)=CC=C1NC(N[C@H]([C@H](C2=CC=C(OC)C=C2)CN3)C3=O)=O	4.6	950
9	ClC(C=C1)=CC=C1NC(N[C@@H]([C@@H](C2=CC=C(OC)C=C2)CN3)C3=O)=O	0.9	81
10	ClC(C=C1)=CC=C1NC(N[C@H]([C@@H](C2=CC=C(OC)C=C2)CN3)C3=O)=O	34	910
11a	ClC(C=C1)=CC=C1NC(N[C@@H]([C@H](C2=CC=C(OC)C=C2)CN3)C3=O)=O	0.092	3.8
11b	FC(C=C1)=CC=C1NC(N[C@@H]([C@H](C2=CC=C(OC)C=C2)CN3)C3=O)=O	0.085	9
12a	FC(C=C1)=CC=C1NC(N[C@@H]([C@H](C2=CC=C(OC)C=C2F)CN3)C3=O)=O	0.45	86
12b	FC(C=C1)=CC=C1NC(N[C@@H]([C@H](C2=CC=C(OC)C(F)=C2)CN3)C3=O)=O	0.9	72
12c	FC(C=C1)=CC=C1NC(N[C@@H]([C@H](C2=CC=C(OC)C=C2Cl)CN3)C3=O)=O	4	410
12d	FC(C=C1)=CC=C1NC(N[C@@H]([C@H](C2=CC=C(OC)C=C2C)CN3)C3=O)=O	1.6	76
12e	ClC(C=C1F)=CC=C1[C@H](CN2)[C@H](NC(NC3=CC=C(F)C=C3)=O)C2=O	3.1	29
12f	FC(C=C1)=CC=C1NC(N[C@@H]([C@H](C2=CC(F)=C(OC)C=C2F)CN3)C3=O)=O	0.15	17
12g	FC(C=C1)=CC=C1NC(N[C@@H]([C@H](C2=C(F)C=C(OC)C=C2F)CN3)C3=O)=O	0.14	280
12h	FC(C=C1)=CC=C1NC(N[C@@H]([C@H](C2=NC=C(OC)C=C2F)CN3)C3=O)=O	0.36	190
12i	FC(C=C1)=CC=C1NC(N[C@@H]([C@H](C2=C(F)C=C(OCC)C=C2F)CN3)C3=O)=O	14
12j	FC(C=C1)=CC=C1NC(N[C@@H]([C@H](C2=C(F)C=C(CC)C=C2F)CN3)C3=O)=O	5.8	1500
12k	FC(C=C1)=CC=C1NC(N[C@@H]([C@H](C2=C(F)C=C(C#N)C=C2F)CN3)C3=O)=O	9.7	40000
12l	FC(C=C1)=CC=C1NC(N[C@@H]([C@H](C2=C(F)C=C(NC)C=C2F)CN3)C3=O)=O	1.4	1900
13a	O=C(NC1=CC=CC(F)=C1)N[C@@H]([C@H](C2=C(F)C=C(OC)C=C2F)CN3)C3=O	0.14	280
13b	O=C(NC1=CC=CC=C1F)N[C@@H]([C@H](C2=C(F)C=C(OC)C=C2F)CN3)C3=O	43
13c	O=C(NC1=CC=CC=C1)N[C@@H]([C@H](C2=C(F)C=C(OC)C=C2F)CN3)C3=O	0.41	2800
13d	O=C(NC1=CC=C(Cl)C=C1)N[C@@H]([C@H](C2=C(F)C=C(OC)C=C2F)CN3)C3=O	0.11	120
13e	O=C(NC1=CC=C(Br)C=C1)N[C@@H]([C@H](C2=C(F)C=C(OC)C=C2F)CN3)C3=O	0.19	96
13f	O=C(NC1=CC=C(C#N)C=C1)N[C@@H]([C@H](C2=C(F)C=C(OC)C=C2F)CN3)C3=O	0.78	350
13g	O=C(NC1=CC=C(C)C=C1)N[C@@H]([C@H](C2=C(F)C=C(OC)C=C2F)CN3)C3=O	2	3200
13h	O=C(NC1=CC=C(OC)C=C1)N[C@@H]([C@H](C2=C(F)C=C(OC)C=C2F)CN3)C3=O	3.2	1000
13i	O=C(NC1=CC=C(F)C(F)=C1)N[C@@H]([C@H](C2=C(F)C=C(OC)C=C2F)CN3)C3=O	0.16	820
13j	O=C(NC1=CC=C(F)C(O)=C1)N[C@@H]([C@H](C2=C(F)C=C(OC)C=C2F)CN3)C3=O	0.087	72
13k	O=C(NC1=CC=C(Cl)C(O)=C1)N[C@@H]([C@H](C2=C(F)C=C(OC)C=C2F)CN3)C3=O	0.05	40
13l	O=C(NC1=CC=C(C)C(O)=C1)N[C@@H]([C@H](C2=C(F)C=C(OC)C=C2F)CN3)C3=O	0.078	1000
13m	O=C(NC1=CC=C(Cl)C=N1)N[C@@H]([C@H](C2=C(F)C=C(OC)C=C2F)CN3)C3=O	4.5	6900
13n	O=C(NC1=CC=C(Cl)S1)N[C@@H]([C@H](C2=C(F)C=C(OC)C=C2F)CN3)C3=O	0.29	1200
13o	O=C(NC1=NC=C(Cl)S1)N[C@@H]([C@H](C2=C(F)C=C(OC)C=C2F)CN3)C3=O	1.9
13p	O=C(NC1=CC(Cl)=NS1)N[C@@H]([C@H](C2=C(F)C=C(OC)C=C2F)CN3)C3=O	0.32	290
13q	O=C(NC1=CC(C=CC=C2)=C2S1)N[C@@H]([C@H](C3=C(F)C=C(OC)C=C3F)CN4)C4=O	0.76	3000
14	COC1=CC=C(/N=C/C2=CC=C(OC)C=C2)C=C1
15	O=C1N(C2=CC=C(OC)C=C2)C(C3=CC=C(OC)C=C3)C1N4C(C(C=CC=C5)=C5C4=O)=O
16	O=C1NC(C2=CC=C(OC)C=C2)C1N3C(C(C=CC=C4)=C4C3=O)=O
17	NC1C(NC1=O)C2=CC=C(OC)C=C2
18	O[C@@H]1[C@@H](N(C2=CC=C(OC)C=C2)C1=O)C3=CC=C(OC)C=C3
19	O=C1N(C2=CC=C(OC)C=C2)[C@@H](C3=CC=C(OC)C=C3)[C@@H]1N=[N+]=[N-]
20	O=C1N[C@@H](C2=CC=C(OC)C=C2)[C@@H]1N=[N+]=[N-]
21	O=[N+](/C=C/C1=CC=C(OC)C=C1)[O-]
22	O=C(C(F)(F)F)NC(C(OC(C)(C)C)=O)C(C[N+]([O-])=O)C1=CC=C(OC)C=C1
23	O=C(C(F)(F)F)NC(C(O)=O)C(C[N+]([O-])=O)C1=CC=C(OC)C=C1
24	O=C(C(F)(F)F)NC(C(OC)=O)C(C[N+]([O-])=O)C1=CC=C(OC)C=C1
25	O=C1C(NC(C(F)(F)F)=O)C(C2=CC=C(OC)C=C2)CN1
26	NC(C(C1=CC=C(OC)C=C1)CN2)C2=O
27	COC(C=C1)=CC=C1/C=C/C#N
28	O=C(C(C(OC)=O)C(C1=CC=C(OC)C=C1)CC#N)OC
29	O=C1NCC[C@@H](C2=CC=C(OC)C=C2)[C@@H]1C(OC)=O
30	O=C1NCC[C@@H](C2=CC=C(OC)C=C2)[C@@H]1C(O)=O
31	O=C(C(C(C1=CC=C(OC)C=C1)C[N+]([O-])=O)NC(OC(C)(C)C)=O)OCC
32	O=C1C(NC(OC(C)(C)C)=O)C(C2=CC=C(OC)C=C2)CN1
33	O=C1C(NC(OC(C)(C)C)=O)C(C2=CC=C(OC)C=C2)CN1
34	COC1=CC=C([C@H](C(C(OC)=O)C(OC)=O)C[N+]([O-])=O)C=C1
35	O=C1[C@H](C(OC)=O)[C@@H](C2=CC=C(OC)C=C2)CN1
36	O=C1[C@H](C(O)=O)[C@@H](C2=CC=C(OC)C=C2)CN1
37	COC1=CC=C([C@@H](C(C(OC)=O)C(OC)=O)C[N+]([O-])=O)C=C1
38	O=C1[C@@H](C(OC)=O)[C@H](C2=CC=C(OC)C=C2)CN1
39	O=C1[C@@H](C(O)=O)[C@H](C2=CC=C(OC)C=C2)CN1
40	FC1=C(C=O)C(F)=CC(OC)=C1
41	FC1=C(/C=C/[N+]([O-])=O)C(F)=CC(OC)=C1
42	FC1=C([C@@H](C(C(OC)=O)C(OC)=O)C[N+]([O-])=O)C(F)=CC(OC)=C1
43	O=C1[C@@H](C(OC)=O)[C@H](C2=CC=C(OC)C=C2)CN1
44	O=C1[C@@H](C(O)=O)[C@H](C2=CC=C(OC)C=C2)CN1
45	O=C1[C@H](NC(OCC2=CC=CC=C2)=O)[C@@H](C3=C(F)C=C(OC)C=C3F)CN1
46	N[C@H]([C@@H](C1=C(F)C=C(OC)C=C1F)CN2)C2=O
